# Supplementary material for: Combining WGCNA and machine learning to construct immune-related EMT patterns to predict HCC prognosis and immune microenvironment
Source: Aging (Albany NY). 2023 Jul 21;15(14):7146–60. doi: 10.18632/aging.204898 (PMC10415538; doi:10.18632/aging.204898)
Supplement: Supplementary Table 1 [file aging-15-204898-s001.xlsx]

## Sheet: Sheet1
Supplementary Table 1. Details of EMT-related genes.
gene
TGFB1
SNAI1
ZEB1
CDH1
TWIST1
CTNNB1
STAT3
SNAI2
HIF1A
AKT1
MIR200C
ZEB2
SMAD3
EGFR
MIR200B
SMAD2
MIR200A
NOTCH1
MIR21
ILK
GSK3B
NFKB1
IL6
HMGA2
CXCR4
TP53
EGF
MTDH
MAPK1
CD44
BMI1
PTEN
MTOR
VIM
RAC1
MMP9
MMP2
GLI1
MET
SMAD4
KLF4
WNT5A
MYC
SMAD7
SIRT1
CTGF
CCR7
PROM1
TGFB2
PIK3CA
MIR34A
RHOA
AR
CD274
FOXM1
YAP1
SRC
MIR30A
MIR205
MALAT1
JAK2
WWTR1
CDH2
TNF
CXCL12
RELA
MAPK3
MIR221
MIR145
CXCL8
HGF
FN1
TWIST2
TP63
NANOG
VEGFA
SP1
S100A4
PTK2
MAPK7
MUC1
HMGB1
EZH2
ESR1
HOTAIR
CAV1
SOX2
BMP7
BMP4
SHH
PTGS2
POU5F1
PRRX1
KRAS
ID1
H19
FGFR1
POSTN
FOXQ1
MTA1
GRHL2
TRPS1
ADAM17
T
AURKA
BMP2
CCL18
CCL2
ROCK1
MIR429
ESRP1
PPARG
NTRK2
EPCAM
MIR93
MIR204
MIR203A
MIR186
MIR155
MIR148A
LOXL2
LGALS1
JUN
ITGB1
HDAC1
GREM1
KDM1A
AGER
NUMB
WNT1
EZR
TLR4
TCF3
STK11
UCA1
CCL21
CCL20
LEF1
PAX2
DDR2
YBX1
MCAM
MIR26B
MIR23A
MIR214
MIR19A
MIR150
MIR141
MIR124-1
MIR101-1
LOX
LCN2
IL17A
IL1B
IGF1R
IGF1
HSF1
HNF4A
FOXA1
FOXC2
ERBB2
EGR1
KLF8
NES
LINC-ROR
MIR300
NUAK1
DCLK1
CLDN1
RUNX2
TET1
TP73
THBD
TGM2
TGFBR3
TGFBR2
TGFB3
STIM1
SRF
BRCA1
SPARC
SOX9
SOX4
FSCN1
SIX1
SDC1
SATB1
BCL2L1
OVOL2
MKL1
NDRG2
EIF5A2
PARD3
PRKCI
AXL
FBXW7
TRIM33
PAK1
OSM
ROR2
NOTCH2
MSX2
MMP14
MIR9-1
MIR30C2
MIR30C1
MIR29C
MIR29B1
MIR26A1
MIR137
MIR130B
MIR10B
MIR106B
MIR106A
MIRLET7A1
LEP
L1CAM
RHOC
CYR61
BIRC5
HSPA5
HOXA13
ANXA2
PDCD4
GATA3
ALK
FLOT2
FOXO3
FOXC1
FGFR2
FGF2
AKT2
EPAS1
DNMT1
DAB2
CUX1
CTNND1
CTBP1
MAPK14
NLRP3
CYTOR
AGR2
NDRG1
CDKN1B
CD24
TNFSF15
GDF15
TP53INP1
TM4SF5
WNT3A
WISP2
NRP1
ACTL6A
CUL4A
FZD7
FOSL1
ADAM12
PDGFD
VASH2
TBL1XR1
TNFAIP8L2
YWHAG
YY1
XBP1
WT1
VDR
CCR2
MIR655
NR2C2
TIMP2
TGFBR1
TGFA
TERT
MIR630
MIR590
TCF4
BSG
SPRR2A
SPP1
SKIL
SMURF2
SFRP2
CXCL5
CCL5
BDNF
BCL2
RB1
PTPN11
MIR491
MIR485
CEMIP
SALL4
TMPRSS4
MAPK8
PRKCA
MEG3
TUG1
SEMA4C
PIN1
PGF
SERPINF1
GOLM1
PAWR
MIR375
MIR361
NODAL
ATM
MUC4
MMP7
FOXO4
MAP3K4
MAP3K3
MDM2
MIR96
MIR31
MIR222
MIR218-1
MIR181A1
MIR194-1
MIR185
MIR182
MIR181A2
MIR17
MIR143
MIR130A
MIR128-1
MIR10A
JUNB
ITGA5
IGFBP7
HSPB1
HSPA4
HOXB7
FOXA2
HMOX1
HDGF
HAS2
SENP1
RGCC
NEAT1
GPC3
USP22
FOXO1
DKK1
EFEMP1
VWCE
F2R
ELF5
EPHA2
EDN1
JAG1
DLX2
CTSL
PARP1
CRKL
FERMT2
TXNIP
SPRY2
ADAM10
TRIM28
NAMPT
MIR1271
HDAC6
ZBTB33
CDC42
HS3ST3B1
SETDB1
HDAC4
UBE3C
BAG3
MAGED1
CD36
ABCG2
NTN1
ADIPOQ
RNF8
ACVR1
CCNA2
SQSTM1
SPHK1
HDAC3
WISP3
NRP2
RUNX3
STC2
RUNX1
TNFSF11
BHLHE40
LGR5
HAVCR2
AFAP1L2
DYRK2
PITPNM3
AXIN2
AXIN1
NCOA3
ACTN4
ESRP2
PEAK1
CA9
YWHAZ
KDM6A
TUFT1
TPBG
TP53BP2
TLE1
TIMP1
TIAM1
TGFB1I1
TEAD1
TCF21
MIR616
MIR612
MAP3K7
STAT5B
STAT5A
STAT1
BRAF
SRI
SPOCK1
SOX5
BMP6
SKP2
SIM2
SDC2
CCL19
CEACAM1
RPS6KB1
ALX4
RNH1
CCND1
KDM5A
ACTA2
RAF1
PTX3
CIP2A
MTA3
MIR506
MIR497
MIR494
MIR489
PTHLH
PBXIP1
PAK5
CTNNBIP1
KLK6
PRSS8
PROP1
MAP2K1
ERBIN
BTBD7
PRKAA1
TRIM62
RNF111
IL17RD
PLAUR
PKD1
CDK14
PFN2
SUFU
IL23A
MAGEC2
HOOK1
PDCD1
CRIM1
EGFL7
PCBP1
F11R
SERPINE1
FURIN
PEBP1
P2RY2
NFKBIA
NF1
NCL
CEACAM6
MIR196B
MIR373
MIR135B
ZFAS1
MMP3
MMP1
ASCL1
MGAT3
MDK
MCL1
MIR34C
MIR33A
MIR30D
MIR301A
MIR27A
MIR24-1
MIR224
MIR223
MIR218-2
MIR206
MIR20A
MIR199A1
MIR193A
MIR191
MIR187
MIR183
MIR16-1
MIR15B
MIR15A
MIR153-1
MIR146A
MIR135A1
MIR134
MIR132
MIR124-3
MIR124-2
MIR122
MIR101-2
MIR100
LMNA
LGALS3
LASP1
LAMA5
KIT
CD82
JARID2
ITGB4
ITGA3
ITGA2
AQP5
AQP3
IL11
CXCR2
MACC1
TNC
HES1
PRMT1
HRAS
HOXB9
HOXA10
HMGB3
HIC1
HDAC2
H2AFX
GSN
UHRF1
CPS1-IT1
HIPK2
GRN
GPR32
ANG
GLI2
GJB1
NOX1
LRIG1
SLC39A6
FZD2
FUT4
BRD4
SIRT3
DICER1
SATB2
BOP1
EPB41L3
KDM4B
FGF9
FGF1
ETV4
ESRRA
ESR2
ERG
EPS8
EPO
EPHB2
GKN2
TET3
AHR
E2F1
HBEGF
DLX4
DAB2IP
PAQR3
CTSZ
GLIPR2
SLC30A7
RBFOX3
CSNK2B
CRYAB
LINC00261
CRK
CREB1
CLDN7
CLDN4
CLU
UHRF2
EHMT2
PROKR1
WASF3
CFTR
KHDRBS1
TRIM16
CEBPB
CEBPA
HOXB13
TACC3
CDX2
FAM3C
CDKN2A
CDK5
NPTN-IT1
SPRY4-IT1
ZEB2-AS1
MIR1236
MIR675
FGF19
RBM8A
MRC2
GAB2
CD151
HDAC9
SEMA3E
VGLL4
CD63
MICAL2
ISG15
PITPNM1
CXCL14
ONECUT2
ROCK2
RASAL2
EIF2AK3
MAP4K4
QKI
HAND1
CYP7B1
MUC16
FOXP2
ZFYVE9
SLC9A3R1
KL
LHX2
IGSF8
NREP
CD14
NOG
LRRFIP1
MARVELD3
ARHGEF2
SMC3
LATS1
NMI
AOC4P
PSTPIP1
SOCS3
HS6ST2
CCNG2
CDKL2
BTRC
CCND2
TIMELESS
NR1I2
KAT2B
INPP4B
SCEL
TNFRSF11A
TNFSF10
TNFSF12
CBR1
EED
ABCC3
CBLB
EIF3I
IRS2
SCIN
IKBKG
PIK3R3
AJUBA
PPM1D
GEMIN2
USMG5
SEMA7A
LOXL3
HINT2
SPZ1
TEAD2
FOXN1
CUL3
KAT8
SPOP
MARVELD1
ITCH
YPEL3
CAPZA1
CAPNS1
SMC1A
USP9X
VANGL1
TRIM11
WNT5B
IFT88
SETD7
PTP4A2
MED28
ELL3
NUBPL
FBXO11
MICALL2
LIN28A
TRPM8
DDR1
ZYX
ZNF217
PCGF2
ZNF143
MIR802
MIR454
MZF1
ZFP36
WNT11
WNT6
VTN
VSNL1
VHL
VCP
UCP2
UCHL3
TYRO3
TYMS
TXN
TUFM
C5AR1
PHLDA2
TSC2
TSC1
MIR663A
TRPC5
ACTG2
TP53BP1
TNXB
TNS1
TLN1
TLE4
TJP1
TIMP3
NR2F2
TFCP2
TDGF1
MIR92B
MIR646
MIR639
MIR638
TCF7
MIR573
TBX3
TBX2
TAZ
KLF5
ST14
SREBF1
SOX3
SON
SOD2
MIR487B
STK33
SLIT3
SLC2A1
SKP1
SKI
ST8SIA1
ST6GAL1
SIAH2
SIAH1
SHC1
CPEB1
AKTIP
SFTPC
SOX17
SEMA4A
ELSPBP1
GOLPH3
CX3CL1
CCL25
CCL22
CCL3
SERPINB4
ATXN1
SALL1
S100P
S100A9
S100A8
S100A6
S100A2
ROS1
RORC
EXOC4
BCL6
RGS3
RDX
HAS2-AS1
RBP2
SENP2
NTN4
RASA1
PRUNE1
CXCL16
PTPRZ1
NKX3-2
PTPN14
PTPN6
SCUBE2
EPB41L5
PTN
STIM2
MTUS1
MKL2
MIR522
MIR517C
MIR520G
MIR452
RAB22A
CAMK1D
TBX20
POGLUT1
PROX1
AJAP1
PRKCQ
HDAC8
PAG1
KDM3A
FOXJ2
PRKCE
PRKAA2
FERMT1
MIR449A
LGR4
BRF2
IMP3
PTPA
PPP1R8
GIPC2
POMC
ERRFI1
MBD3
PLS3
PLAGL2
PLA2G4A
PIK3R1
SERPINI1
ABCB1
STK26
WWOX
UIMC1
CYB5R1
PDGFRB
ACKR4
PDGFB
LIMA1
PRRX2
PDE4A
UBR5
PLAC8
TFDP3
PCSK1
ING4
ANGPTL4
PCMT1
GMNN
PCDH9
PBX3
PARD6A
NEUROG3
IL22
PRDX1
DUXAP9
OPRM1
MIR424
MIR382
MIR381
NUCB2
ROR1
NTRK3
NPPA
NOV
NOTCH4
NOTCH3
NME1
NKX6-1
NFIL3
NFIC
MYL2
MYD88
MYCN
MYBL2
MYB
TRIM37
MUC2
MST1R
MSN
MIR345
MIR331
MIR326
MMP19
MMP13
MMP11
MMP8
MLLT3
ASCL2
MITF
CXCL9
MEF2D
MDM4
ART1
SMAD9
ARRB1
MIR7-1
MIR30E
MIR30B
MIR302A
MIR29A
MIR26A2
MIR25
MIR24-2
MIR23B
MIR217
MIR216A
MIR211
MIR208A
MIR199A2
MIR190A
MIR181B1
MIR153-2
MIR152
MIR149
MIR144
MIR136
MIR129-1
MIR125B1
MIRLET7G
MIRLET7D
MIRLET7B
LYN
LTBP1
LRP6
LMNB1
LIMS1
LIF
LGALS9
LAMC2
USP17L9P
RHOG
NANOGP8
KRT19
RHOB
KMT5A
KRT18
KRT17
KRT8
KRT7
KIF5B
KDR
KCNN4
KCNH1
JAK3
JAG2
ITGB6
ITGB3
IRS1
IRF6
AQP9
ITGA6
FOXK2
IL18
IL6R
IL4
FAS
IGFBP3
MCRIP1
IRGM
NANOS3
IDH2
IDH1
ID2
IRF8
RAB43
HTN1
HSP90AA1
HSPB2
BIRC2
HRG
HPGD
HOXD9
APBB1
HOXA9
HNRNPAB
NR4A1
HK2
HIP1
EHD2
ANXA5
H2AFZ
ANXA1
REPIN1
OLA1
CARD10
GSK3A
BRD7
TBK1
FHOD1
GRIN1
ANPEP
TUSC7
LAMA1
CAVIN1
GPI
GOLGA2
GLRX
GLS
EML4
GLO1
GLS2
AGO2
DKK3
BBC3
LYPD3
GJB2
AMHR2
GH1
GATA6
GATA1
GAPDH
SIN3A
LETMD1
BRMS1
ARMC8
TXN2
SPDEF
FSCN2
CBY1
CERS6
NR5A2
FSHR
IL27
ZMYND8
CCNDBP1
PADI4
MMD
SCRIB
SUZ12
NCSTN
ARHGEF12
NEDD4L
FMR1
EXOC7
FLT1
FLNA
KDM6B
PLXND1
PEG10
SNW1
ALDOB
CEP164
FKBP5
PHLDA1
XRN2
FHL2
FHL1
SCUBE3
FCN2
ZEB1-AS1
FBP1
FASN
FBLN1
ALDH1A1
F3
F2RL2
F2
ETV1
ETS2
ETS1
ESRRB
ALAD
ERN1
ERF
EPHB3
EPHA8
EPHA4
EP300
ENO1
ENG
EMP3
FBXO45
RPL22L1
ELK3
ELK1
CYP4Z1
ELAVL1
EIF5A
EIF4G1
EIF4E
EIF2S1
RMST
EFNB2
EEF1D
EDNRA
ECT2
DVL2
AGTR1
DNMT3B
DDX5
DAPK1
CYP3A5
PEBP4
ZNF746
CYP1B1
CMTM8
CSPG4
VCAN
CSK
CSF2
CRP
CRMP1
FOXR2
CREBBP
ADM
KLF6
COL8A2
COL8A1
KLF17
CNTN1
MSI2
CCR6
CCR5
CLK2
LRG1
CKS2
BATF2
CTHRC1
CIRBP
MGLL
VSIG4
EGLN3
PKP3
RASSF1
FSTL1
PTP4A3
BVES
FOXN3
PIM2
EHD1
PPARGC1A
PGRMC1
HPSE
CCR9
MTHFD2
KDM5B
GNA13
LEFTY1
PDPN
CXCL13
FBLN5
CEACAM5
FST
MAD2L2
TAB1
RACK1
PAK4
CDKN1A
SPRY1
MSLN
PSME3
LINC01186
CDK3
G3BP1
TRAP1
CDH13
CDH11
NR1H3
MICA
OCLN
DNAJB6
MIR1181
CDH5
FRAT1
PDCD6IP
HDAC5
MIR124-2HG
MIR875
MIR888
COL3A1
COL5A2
COL5A1
FBN1
COL1A1
COL6A3
COL1A2
COL4A1
COL4A2
TGFBI
LUM
LAMC1
CCN2
TAGLN
COL7A1
COL6A2
ITGAV
THBS2
COL16A1
NNMT
TPM1
COL11A1
THBS1
FAP
BGN
SERPINH1
THY1
TFPI2
NID2
ITGB5
LOXL1
COL12A1
ELN
COMP
BMP1
IL32
LAMA3
QSOX1
VCAM1
CCN1
EDIL3
CALD1
MAGEE1
SGCB
ECM1
LAMA2
FSTL3
TPM2
INHBA
BASP1
MGP
CXCL1
PLOD2
PCOLCE
COL5A3
HTRA1
SNTB1
GADD45A
MEST
LRRC15
TNFRSF11B
CD59
EFEMP2
MATN2
PCOLCE2
SERPINE2
GPC1
ABI3BP
FUCA1
PMEPA1
FBN2
IGFBP2
SDC4
GADD45B
GLIPR1
P3H1
VEGFC
SGCD
PLOD1
MATN3
MYL9
SLC6A8
CALU
TNFRSF12A
FMOD
GEM
MYLK
SFRP1
PLOD3
APLP1
FBLN2
MSX1
FZD8
DST
TPM4
DCN
GJA1
PMP22
IGFBP4
COPA
LRP1
MFAP5
SFRP4
RGS4
CDH6
SAT1
NT5E
DPYSL3
PPIB
SGCG
PDLIM4
ECM2
CRLF1
AREG
IL15
MCM7
GAS1
PRSS2
CADM1
OXTR
SCG2
CXCL6
TNFAIP3
CAPG
CAP2
MXRA5
NTM
ENO2
PVR
SLIT2
COLGALT1
GPX7
WIPF1
CLDN2
KRT20
PALLD
CLDN3
DSP
SOX10
ADH1B
AKR1C2
AOPEP
CA2
CADM3
CELSR2
COBL
CRIP2
CXADR
FGFBP1
FN2
ACKR3
ATF3
B2M
BCL3
CD68
CDH12
CDH15
CFH
CHKA
COL6A1
CYP2F1
AHNAK
STEAP1
TMEM132A
FZD1
IGFBP5
NXN
PDGFRA
PLAT
PLAU
PRICKLE1
ADGRF1
ADGRG1
ANKRD22
ANTXR2
AP1M2
BSPRY
C1ORF116
CARD6
CDH3
CDS1
CRB3
ELMO3
ENPP5
EPHA1
EPN3
MIR-200
MIR-369-5P
MIR-450A
MIR-542-5P
MIR370
GSC
ASPA
FOXP3
FZD4
GLI3
ADAM9
AEBP1
ANGPTL2
ASAP1-IT1
ATP2B1
CALM1
CLEC11A
EMILIN1
GNS
HSPG2
IL13RA1
ABCA12
ABCC4
ACSL4
AGPAT5
AIF1L
ANLN
ANP32E
ANXA9
AP1S2
ARL4A
ARSJ
ATCAY
AURKB
BIRC3
CAMK4
CCDC82
CCDC88A
CD83
ACP1
CYP27B1
CYP4F11
FADS1
GNAL
IL1RN
KRT5
MAP7
PTPN3
SNCA
TRIM29
WWC1
FMO1
GBP3
IFITM3
IRF7
MMP12
ACTA1
BCL9
CALCR
CAMK2N1
CASP3
CAV2
CCNB2
CD47
ACPP
ADAM23
ADAMTS1
AFF3
AGR3
AK5
AKAP12
ALDH3B2
ALPK2
ANK3
ANKRD1
ANTXR1
ANXA6
AOX1
ARHGAP8
A2M
AARD
ABLIM1
ACSS1
ACTBL2
ADRA1B
AHNAK2
ARID5B
ARL4D
ARTN
B3GNT3
BCAM
BCAR3
C16ORF74
HOXA5
CXCL10
IFI16
IFI27
IFI30
IFI44
IFIH1
IFIT1
IFIT2
IFIT3
IFITM1
IFITM2
IRF1
IRF9
MX1
OAS1
OAS2
OAS3
PHYIN1
PSME1
SOCS1
ABCA1
ABHD17C
ABLIM3
ADAM19
ADAMTS4
ADAMTS6
ADAP1
ADH1A
ADH1C
ADIRF
ADORA2B
AGAP2-AS1
AKAP1
AKR1B10
AKT3
ALDH3A1
CDK4
BCL2A1
BMPR1A
CASP7
CASP9
COL4A3
MKI67
ACTN1
ALDH1A3
ALDH3A2
ALDH5A1
ALOX5AP
AMIGO2
ANKLE2
APBB2
CLDN11
SNAI3
CCT3
CREG1
CYP24A1
DPM1
FLJ32053
FOXD1
FY8
GALNT3
GFPT2
GNG11
IER3
JRKL
KLC2
KRT14
ACOT1
ADGRA2
ADPRH
APOC1
ARHGEF16
ARHGEF40
ARL6IP5
ATP6V1C2
B3GNT9
BCL11A
BLMH
BNIPL
C11ORF24
ARHGEF5
CD99L2
CTAGE6
GRHL1
JUP
LLGL2
LSR
MAL2
MISP
MYO5B
PKP2
2810474019RIK
ASAP1
BAZ1A
CAST
D3ERTD254E
DPP8
DUSP7
ITGBA
KIAA1841
KPNA3
MLF1
PHF20L1
SYDE1
ADGRF4
ARHGEF18
BEAN1
BICDL1
CERCAM
CHST3
CMTM3
DBN1
DEPTOR
EEPD1
EHF
CCL7
CCT6A
CENPA
CHEK1
CHRNB1
COL18A1
CSF1
DCK
CDKN2C
DLC1
EML1
ANXA8
CCN3
CKMT1B
COL17A1
FAM20A
FXYD3
GGT5
GPM6B
CCN6
ARMCX1
BICC1
BMERB1
BNC2
C1S
CYBRD1
DIO2
DOCK10
DSC2
ADAMTS12
ADAMTS2
AP1G1
ATP8B1
CGN
CNOT1
CNRIP1
COL10A1
BAMBI
ID4
LAMC3
ABCF3
ARHGEF9
AVPR1A
BMX
CAPN6
CNIH3
DIO3
DLGAP1
DONSON
EXOC3L2
GCNA
GNB1
GUCY2F
HCAR1
HRK
HTR2A
IRX3
MAGEA8
MIR-346
MIR-507
MIR542
C3ORF52
CLVS2
FREM1
ITGB1BP1
KMO
MIR-30A-3P
MIR-30A-5P
MIR-30C
MIR-30E-3P
MIR-630
MIR192
MIR193B
MIR215
LAMB3
MMP10
P4HA2
ANK2
CDH17
RAB25
ARPC4
BPGM
CHST11
EFNA1
ADGRE5
CD9
NECTIN1
NECTIN2
AFTPH
FA2H
LNX1
MAPK13
MARVELD2
MYO5C
P4HA3
RBM47
UROD
ADAMTSL2
ANO1
ANO6
APCDD1
ARHGAP4
BHLHE41
BST2
BTBD11
C5ORF66
CACNA2D4
CBR3
CBS
CCDC170
CD109
CD22
BAD
LPAR2
MAP2K3
PDPK1
RAB10
RAB5C
RIPK3
WNT10B
FYN
NKD2
PLCB2
C10ORF99
CAVIN3
CDX1
DDC
GPA33
LRATD1
MEIS2
OPMP22
TRABD2A
ACYP1
ARFGAP1
ARPC2
ATOX1
BCAP29
BCAP31
BCAR1
BCLAF1
C9ORF78
CALB2
CALM3
CASK
CBX3
CBX5
CCDC124
CCT2
CDC37
CDV3
NFKB2
AKR1B1
BCAT1
CA12
CHI3L1
COX7A1
DDAH1
DPYD
DSE
DSEL
ENPP1
ENPP2
EXT1
GALNT10
GBE1
GLT8D2
ABCB6
ABCC6
ABCG1
ABL2
ACADSB
ACBD5
ACSM3
ACY1
ADA
ADARB1
AHCYL1
AIMP1
AKR1C3
ATF2
CD34
ERBB3
KLF10
KLK3
FGF8
ALS2CL
ANXA3
ARRDC1
ATP2C2
BAIAP2L1
BICDL2
C19ORF33
C1ORF210
C2ORF15
GJB3
TJP3
ABR
ARHGEF6
CCDC50
CD52
CD93
CHST2
CHST7
CITED1
CLGN
ADGRL2
AFP
ALB
ARHGEF7
CCND3
CDHR5
ADTRP
ALOX15B
ANXA8L1
ARHGAP25
BDKRB2
BIK
BIN1
CAMK2B
NR2F1
RRAS
RUNDC3B
ABHD11
ARHGAP32
ASPN
AZGP1
BCAS1
LAMB1
PAFAH1B1
PAFAH1B2
PAFAH2
PROCR
ADCY1
ADCY2
ADCY4
ADCY5
ADCY6
ADCY7
ADCY8
ADCY9
AKT1S1
AP2A1
AP2A2
AP2B1
AP2M1
AP2S1
ACAA1
ACOT2
ADGRA3
ADORA1
AFAP1
ALYREF
AMOTL1
APOO
ARAP1
ARHGAP5
ARMC9
ATP5PB
BAZ2A
BOK
BRI3BP
BTBD19
CAND1
CCDC92
ELF3
GPX3
KLK10
KLK7
MPZL2
CHD1
CTNNA1
ACADS
CAPN13
CWH43
PEX11G
RAB31
ZNF57
ABCB8
ABI1
ACOX1
ACSL1
ACSL3
ADAL
ADAM15
ADD1
ADGRG6
AGAP3
AGTPBP1
AHSA2P
AK2
AKAP11
AKAP13
ALG9
